# Supplementary material for: Inhibition of TRPA1 Ameliorates Periodontitis by Reducing Periodontal Ligament Cell Oxidative Stress and Apoptosis via PERK/eIF2α/ATF‐4/CHOP Signal Pathway
Source: Hindawi journal article supplement (doi:10.1155/2022/4107915), 2022-01-01

# Supplementary Materials for

Inhibition of TRPA1 could ameliorates periodontitis by reducing Periodontal ligament cells  
oxidative stress and apoptosis via PERK/eIF2 $\alpha$ /ATF-4/CHOP signal pathway

Qian Liu<sup>1,2,3#</sup>, Shujuan Guo<sup>1,2,3#</sup>, Yanli Huang<sup>1,2,4</sup>, Xiuqun Wei<sup>1,2,3</sup>, Li Liu<sup>1,2,3</sup>, Fangjun  
Huo<sup>1,2</sup>, Ping Huang<sup>1,3</sup>, Yafei Wu<sup>1,3\*</sup>, Weidong Tian<sup>1,4\*</sup>

Correspondence to: Yafei Wu, Weidong Tian; Email: [yfw1110@163.com](mailto:yfw1110@163.com), [drtwd@sina.com](mailto:drtwd@sina.com);

This supplementary file includes:

Table S1  
Figure legends  
Fig. S1  
Fig. S2  
Fig. S3  
Fig. S4

## Supplementary information

**Table. S1 The primers sequences used in Real-time quantitative polymerase chain reaction**

| Gene  |          | Sequence                       |
|-------|----------|--------------------------------|
| Cas3  | Forward  | 5'-CCAAAGATCATACATGGAAGCG-3'   |
|       | Backward | 5'-CTGAATGTTTCCCTGAGGTTTG -3'  |
| Cas9  | Forward  | 5'-GACCAGAGATTCGCAAACCAGAGG-3' |
|       | Backward | 5'-AAGAGCACCGACATCACCAAATCC-3' |
| Bax   | Forward  | 5'-CGAACTGGACAGTAACATGGAG-3'   |
|       | Backward | 5'-CAGTTTGCTGGCAAAGTAGAAA-3'   |
| Bcl-2 | Forward  | 5'-GACTTCGCCGAGATGTCCAG-3'     |
|       | Backward | 5'- GAACTCAAAGAAGGCCACAATC-3'  |
| GRP78 | Forward  | 5'-CAGTTGTTACTGTACCAGCCTA-3'   |
|       | Backward | 5'-CATTTAGGCCAGCAATAGTTCC-3'   |
| cymC  | Forward  | 5'-GCCAATAAGAACAAAGGCATCA-3'   |
|       | Backward | 5'-TTAAGTCTGCCCTTTCTTCCTT-3'   |
| TRPM8 | Forward  | 5'-TTCATCGTCTTCGCTTACTTCT-3'   |
|       | Backward | 5'- GGCTTTTGTGTTGATCTTGACA-3'  |
| TRPV1 | Forward  | 5'-CTCACAGACAACGAGTTCAAAG-3'   |
|       | Backward | 5'-CTTGTAGTAGCTGTCCGTGTAG-3'   |
| TRPV4 | Forward  | 5'-CCTACATCATCCTCACCTTTGT-3'   |
|       | Backward | 5'-CTTCCTCAGGAATACGGGGAAG-3'   |
| TRPA1 | Forward  | 5'-CAGTGACCACAATGGCTGGACAG-3'  |
|       | Backward | 5'-GTGCAGTGTTCCCGTCTTCATCC-3'  |
| CHOP  | Forward  | 5'-GAGAATGAAAGGAAAGTGGCAC-3'   |
|       | Backward | 5'-ATTCACCATTCGGTCAATCAGA-3'   |
| PERK  | Forward  | 5'-CCAGTTTTGTACTCCAATTGCA-3'   |
|       | Backward | 5'-CAGATACAGCTGGCCTCTATAC-3'   |
| Cas7  | Forward  | 5'-GCTGGGCAAATGCATCATAATA-3'   |
|       | Backward | 5'-TGGCACAAGAGCAGTCATTATA-3'   |

---

|       |          |                                |
|-------|----------|--------------------------------|
| HSP70 | Forward  | 5'-GATATTGTGCAGTTGCCTACAG-3'   |
|       | Backward | 5'-GGCTTCTTAAGAACAACCTTTCGG-3' |

---

## Supplementary information

### Figure legend

#### **Fig. S1 Cell viability test with drug concentration**

Periodontal ligament cells derived from healthy were used in these tests. CCK8 assay was used to detect cell viability under different concentration of HC030031, 4-PBA, GSK2656157, EGTA ( $n = 3$ ). 10uM HC030031, 500uM 4-PBA, 10uM GSK2656157, 500uM EGTA were used in this study. Data analysis were performed by using one-way ANOVA (\* $P < 0.05$ , \*\* $P < 0.01$ , \*\*\* $P < 0.001$ ). Error bars represent mean  $\pm$  SEM.

#### **Fig. S2 Periodontitis mice model and TRPA1 expression in periodontium**

a, Representative Micro-CT images, H&E staining and immunohistochemical staining (red error indicated highly expressed TRPA1 proteins) of mice maxillary in health control and periodontitis group. b, Quantitative statistical analysis of alveolar bone loss in Micro-CT ( $n = 5$ ). ALB: alveolar bone loss. Data analysis were performed by using one-way ANOVA (\* $P < 0.05$ , \*\* $P < 0.01$ , \*\*\* $P < 0.001$ ). Error bars represent mean  $\pm$  SEM.

#### **Fig. S3 Quantitative analysis of alveolar bone loss and changes of CRP and body weight**

a, Quantitative statistical analysis of alveolar bone loss in buccal or in palatal of Micro-CT in Con, Perio, HC1 and HC3 groups ( $n = 4$ ). b, Body weight change of mice in Con, Perio, HC1 and HC3 groups ( $n = 4$ ). c, serum CRP levels change of mice in Con, Perio, HC1 and HC3 groups ( $n = 4$ ). Data analysis were performed by using one-way ANOVA (\* $P < 0.05$ , \*\* $P < 0.01$ , \*\*\* $P < 0.001$ ). Error bars represent mean  $\pm$  SEM.

#### **Fig. S4 H&E staining of mice organs**

Representative H&E staining images of mice organs (heart, liver, spleen, lung, kidney) in Con, Perio, HC1 and HC3 groups.

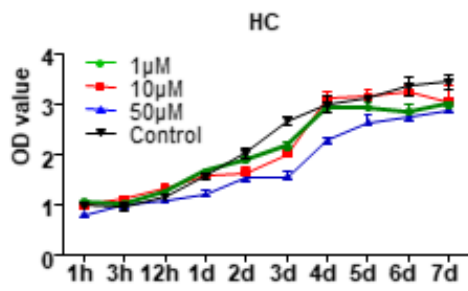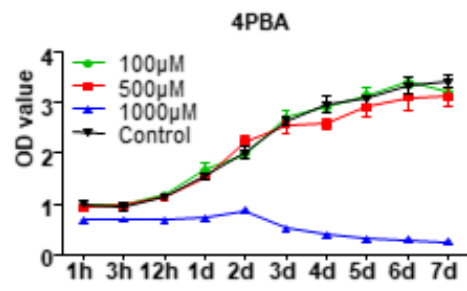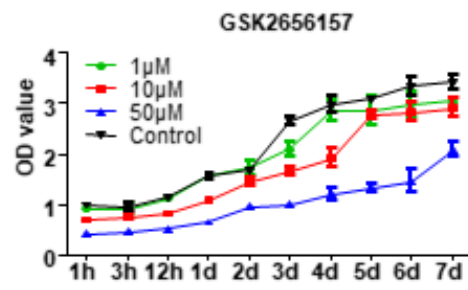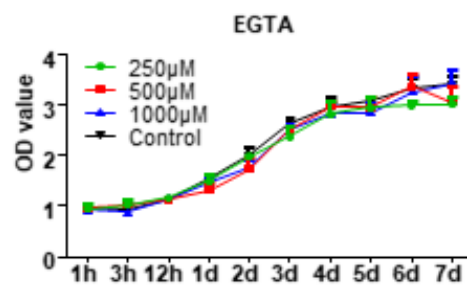

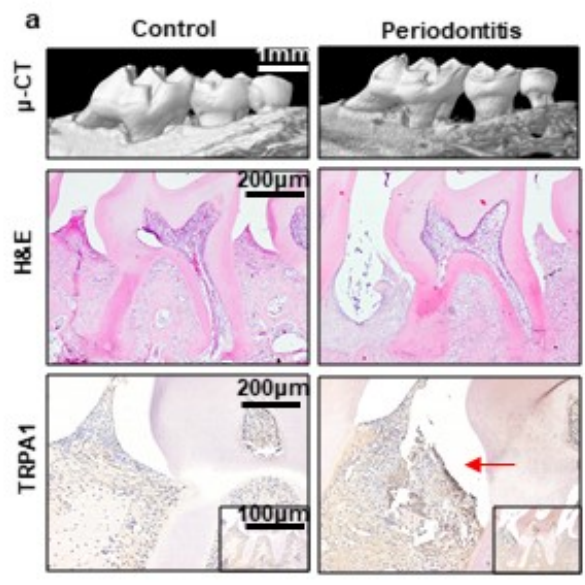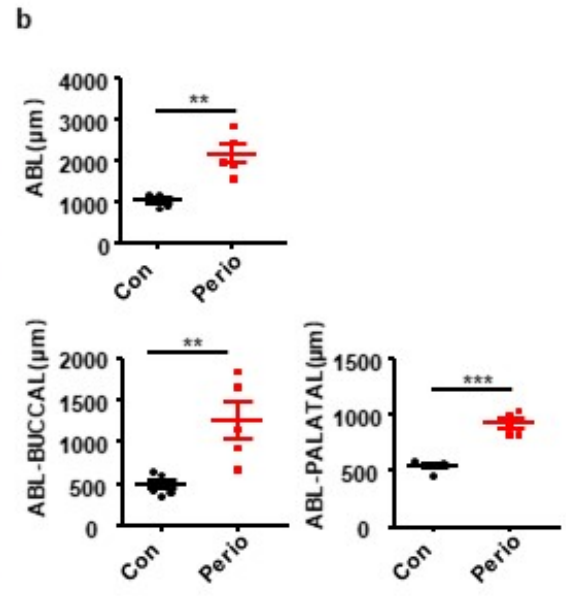

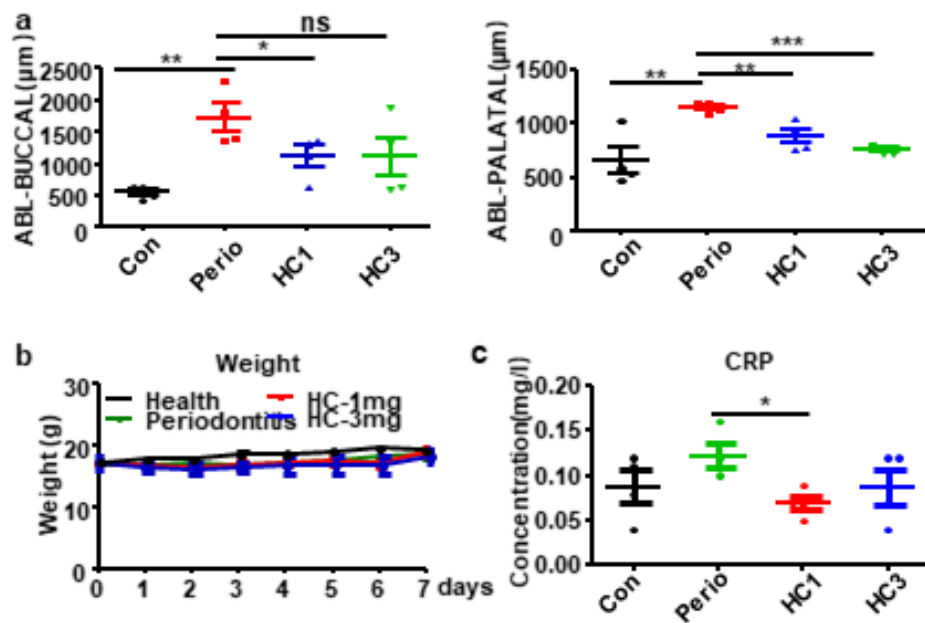

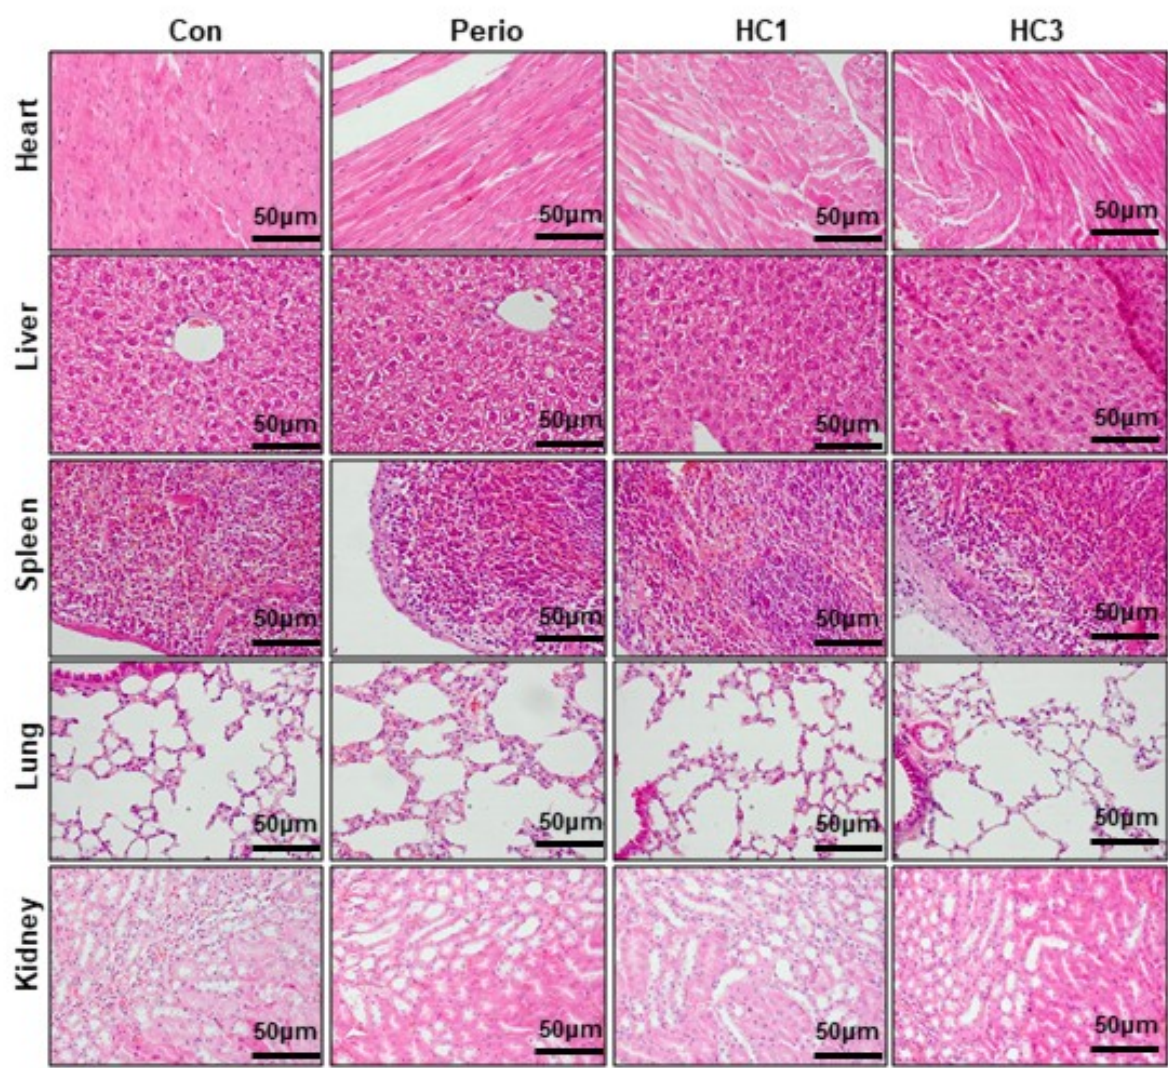

Supplement: f1 [file 4107915.f1.pdf]
